# Supplementary material
Source: PubMed Central journal article supplement (PMC11029791)
Supplement: 262_2015_1765_MOESM1_ESM.pdf [file 262_2015_1765_MOESM1_ESM.pdf]

## Supplementary file

### Supplementary Figure 1

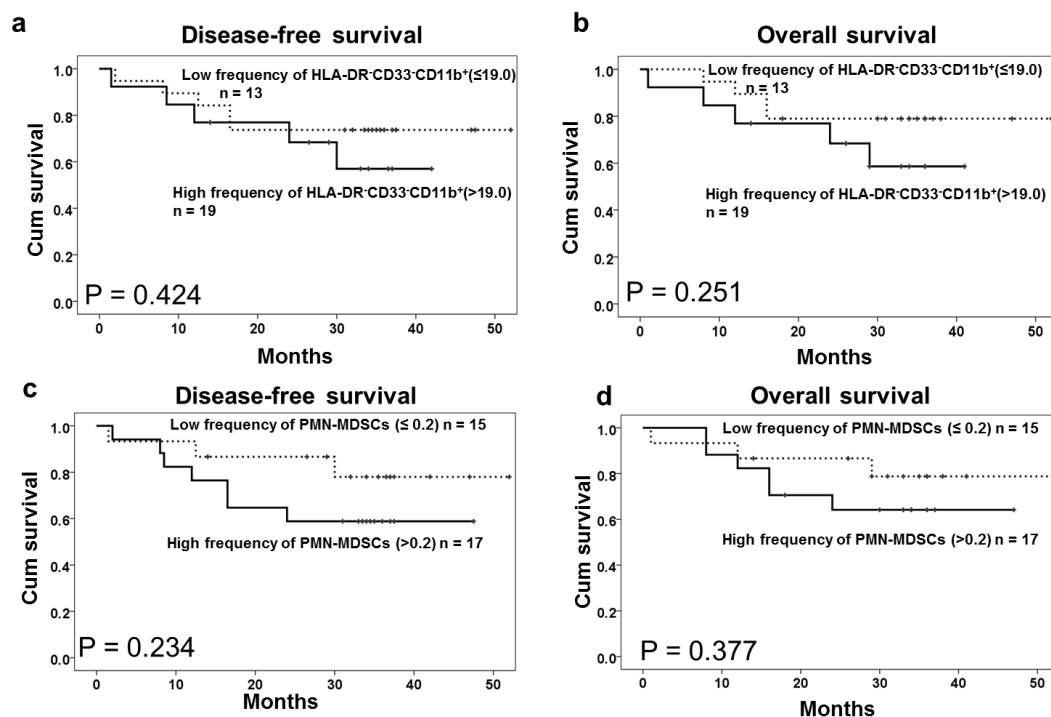

**Supplementary Figure 1** The correlation of circulating HLA-DR<sup>-</sup>CD33<sup>-</sup>CD11b<sup>+</sup> cells and CD15<sup>+</sup> PMN-MDSCs with the survival of ENKL patients. (a-b) The DFS and OS curves for the patients according to the low and high numbers of HLA-DR<sup>-</sup>CD33<sup>-</sup>CD11b<sup>+</sup> cells ( $P > 0.05$ , log-rank test). (c-d) The DFS and OS curves for the patients according to the low and high numbers of CD15<sup>+</sup> PMN-MDSCs ( $P > 0.05$ , log-rank test).

## Supplementary Figure 2

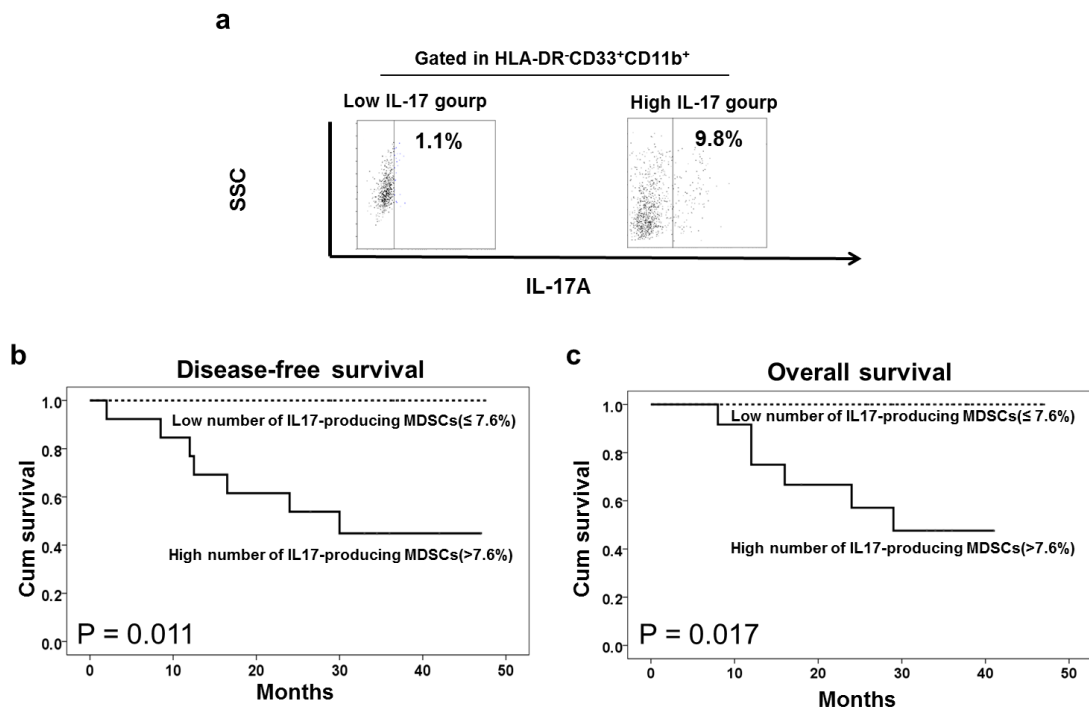

**Supplementary Figure 2 The correlation of circulating IL17-producing MDSCs with DFS and OS in extranodal NK/T-cell lymphoma cases.** (a) The dot plots represent the low and high numbers of IL17-producing MDSCs gating on the MDSC fraction among the PBMCs from four patients with ENKL. (b-c) The DFS and OS curves for the patients according to the low and high numbers of IL17-producing MDSCs (P = 0.011 and 0.017, respectively; log-rank test). The cut-off value was the median of the IL17-producing MDSC density.

**Supplementary Table 1. Clinical characteristics of 32 patients with ENKL**

| <b>Clinicopathological parameters</b> | <b>Cases (%)</b> |
|---------------------------------------|------------------|
| <b>No. of cases</b>                   | 32               |
| <b>Age (y)</b>                        |                  |
| Mean                                  | 40.5             |
| Range                                 | 17-70            |
| <b>Gender</b>                         |                  |
| Female                                | 9 (28.1)         |
| Male                                  | 23 (71.9)        |
| <b>Ann Arbor Stage</b>                |                  |
| I                                     | 19 (59.4)        |
| II                                    | 3 (9.4)          |
| III                                   | 3 (9.4)          |
| IV                                    | 7 (21.9)         |
| <b>Subtypes</b>                       |                  |
| UNKTL                                 | 27 (84.4)        |
| EUNKTL                                | 5 (15.6)         |
| <b>B symptoms</b>                     |                  |
| No                                    | 12 (37.5)        |
| Yes                                   | 20 (62.5)        |
| <b>LDH level</b>                      |                  |
| Normal                                | 23 (71.9)        |
| Elevated                              | 9 (28.1)         |
| <b>KPI score</b>                      |                  |
| 0-1                                   | 17 (53.1)        |
| 2-4                                   | 15 (46.9)        |
| <b>PIT score</b>                      |                  |
| 0-1                                   | 20 (62.5)        |
| 2-4                                   | 12 (37.5)        |
| <b>IPI score</b>                      |                  |
| 0-1                                   | 24 (75.0)        |
| 2-5                                   | 8 (25.0)         |
| <b>Death</b>                          |                  |
| No                                    | 23 (71.9)        |
| Yes                                   | 9 (28.1)         |

LDH, lactate dehydrogenase; IPI, International Prognostic Index; KPI, Korean Prognostic Index; PIT, Prognostic Index for Peripheral T cell lymphoma.

**Supplementary Table 2. Antibody information**

| <b>Name</b>          | <b>Lot number</b> | <b>Clone number</b> | <b>Brand</b>  | <b>Producing area</b> |
|----------------------|-------------------|---------------------|---------------|-----------------------|
| CD14-FITC            | 11-0149-42        | 61D3                | eBioscience   | San Diego, CA, USA    |
| CD15-FITC            | 11-0159-41        | H19B                | eBioscience   | San Diego, CA, USA    |
| HLA-DR-FITC          | 11-9952-42        | L243                | eBioscience   | San Diego, CA, USA    |
| HLA-DR-PE            | 555812            | /                   | BD Bioscience | San Jose, CA, USA     |
| CD66b-APC            | 17-0666-41        | G10F5               | eBioscience   | San Diego, CA, USA    |
| CD11b-PE-Cy7         | 25-0118-42        | ICRF44              | eBioscience   | San Diego, CA, USA    |
| IL17a-PE             | 12-7179-42        | eBio64DEC17         | eBioscience   | San Diego, CA, USA    |
| IFN- $\gamma$ -APC   | 17-7319-82        | 4S.B3               | eBioscience   | San Diego, CA, USA    |
| IL-10-PE             | 559330            | /                   | BD Bioscience | San Jose, CA, USA     |
| TGF- $\beta$ 1 (LAP) | 349606            | TW4-2F8             | BioLegend     | San Diego, CA, USA    |
| CD33-PerCP/Cy5.5     | 303414            | WM53                | BioLegend     | San Diego, CA, USA    |
| NOS2-FITC            | sc-7271           | /                   | Santa Cruz    | Dallas, TX, USA       |
| Arg-1-FITC           | IC5868F           | /                   | Santa Cruz    | Dallas, TX, USA       |

**Supplementary Table 3. The association of the frequency of circulating MDSCs with the clinical parameters of 32 patients with ENKL**

| <b>Clinicopathological parameters</b> | <b>Total cases</b> | <b>High level of HLA-DR<sup>+</sup>CD33<sup>+</sup>CD11b<sup>+</sup> (%)</b> | <b>P value</b> | <b>High level of HLA-DR<sup>+</sup>CD33<sup>+</sup>CD11b<sup>+</sup> (%)</b> | <b>P value</b> |
|---------------------------------------|--------------------|------------------------------------------------------------------------------|----------------|------------------------------------------------------------------------------|----------------|
| <b>Age</b>                            |                    |                                                                              |                |                                                                              |                |
| <40 y                                 | 15                 | 10 (66.7)                                                                    | 0.265          | 10 (66.7)                                                                    | 0.430          |
| ≥40 y                                 | 17                 | 8 (47.1)                                                                     |                | 9 (52.9)                                                                     |                |
| <b>Gender</b>                         |                    |                                                                              |                |                                                                              |                |
| Female                                | 9                  | 7 (77.8)                                                                     | 0.125          | 7 (77.8)                                                                     | 0.185          |
| Male                                  | 23                 | 11 (47.8)                                                                    |                | 12 (52.2)                                                                    |                |
| <b>Ann Arbor Stage</b>                |                    |                                                                              |                |                                                                              |                |
| I                                     | 19                 | 10 (52.6)                                                                    | 0.618          | 14 (73.7)                                                                    | 0.071          |
| II-IV                                 | 13                 | 8 (61.5)                                                                     |                | 5 (38.5)                                                                     |                |
| <b>Subtypes</b>                       |                    |                                                                              |                |                                                                              |                |
| UNKTL                                 | 27                 | 15 (55.6)                                                                    | 0.854          | 16 (59.3)                                                                    | 0.975          |
| EUNKTL                                | 5                  | 3 (60.0)                                                                     |                | 3 (60.0)                                                                     |                |
| <b>LDH level</b>                      |                    |                                                                              |                |                                                                              |                |
| Normal                                | 23                 | 12 (52.2)                                                                    | 0.457          | 13 (56.5)                                                                    | 0.599          |
| Elevated                              | 9                  | 6 (66.7)                                                                     |                | 6 (66.7)                                                                     |                |
| <b>B symptoms</b>                     |                    |                                                                              |                |                                                                              |                |
| No                                    | 12                 | 5 (41.7)                                                                     | 0.198          | 8 (66.7)                                                                     | 0.515          |
| Yes                                   | 20                 | 13 (65.0)                                                                    |                | 11 (55.0)                                                                    |                |
| <b>KPI score</b>                      |                    |                                                                              |                |                                                                              |                |
| 0-1                                   | 17                 | 10 (58.8)                                                                    | 0.755          | 11 (64.7)                                                                    | 0.513          |
| 2-4                                   | 15                 | 8 (53.3)                                                                     |                | 8 (53.3)                                                                     |                |
| <b>PIT score</b>                      |                    |                                                                              |                |                                                                              |                |
| 0-1                                   | 20                 | 12 (60.0)                                                                    | 0.581          | 13 (65.0)                                                                    | 0.403          |
| 2-4                                   | 12                 | 6 (50.0)                                                                     |                | 6 (50.0)                                                                     |                |
| <b>IPI score</b>                      |                    |                                                                              |                |                                                                              |                |
| 0-1                                   | 24                 | 14 (58.3)                                                                    | 0.681          | 14 (58.3)                                                                    | 0.835          |
| 2-5                                   | 8                  | 4 (50.0)                                                                     |                | 5 (62.5)                                                                     |                |

P value as determined by Pearson's  $\chi^2$  test.

**Supplementary Table 4. The association of the frequency of circulating Mo-MDSCs and PMN-MDSCs with the clinical parameters of 32 patients with ENKL**

| <b>Clinicopathological parameters</b> | <b>Total cases</b> | <b>High level of Mo-MDSCs (%)</b> | <b>P value</b> | <b>High level of PMN-MDSCs (%)</b> | <b>P value</b> |
|---------------------------------------|--------------------|-----------------------------------|----------------|------------------------------------|----------------|
| <b>Age</b>                            |                    |                                   |                |                                    |                |
| <40 y                                 | 15                 | 8 (53.3)                          | 0.492          | 10 (66.7)                          | 0.149          |
| ≥40 y                                 | 17                 | 7 (41.2)                          |                | 7 (41.2)                           |                |
| <b>Gender</b>                         |                    |                                   |                |                                    |                |
| Female                                | 9                  | 7 (77.8)                          | <b>0.028*</b>  | 4 (44.4)                           | 0.538          |
| Male                                  | 23                 | 8 (34.8)                          |                | 13 (56.5)                          |                |
| <b>Ann Arbor Stage</b>                |                    |                                   |                |                                    |                |
| I                                     | 19                 | 8 (42.1)                          | 0.513          | 12 (63.2)                          | 0.169          |
| II-IV                                 | 13                 | 7 (53.8)                          |                | 5 (38.5)                           |                |
| <b>Subtypes</b>                       |                    |                                   |                |                                    |                |
| UNKTL                                 | 27                 | 12 (44.4)                         | 0.522          | 15 (55.6)                          | 0.522          |
| EUNKTL                                | 5                  | 3 (60.0)                          |                | 2 (40.0)                           |                |
| <b>LDH level</b>                      |                    |                                   |                |                                    |                |
| Normal                                | 23                 | 11 (47.8)                         | 0.863          | 12 (52.2)                          | 0.863          |
| Elevated                              | 9                  | 3 (44.4)                          |                | 5 (55.6)                           |                |
| <b>B symptoms</b>                     |                    |                                   |                |                                    |                |
| No                                    | 12                 | 5 (41.7)                          | 0.647          | 5 (41.7)                           | 0.314          |
| Yes                                   | 20                 | 10 (50.0)                         |                | 12 (60.0)                          |                |
| <b>KPI score</b>                      |                    |                                   |                |                                    |                |
| 0-1                                   | 17                 | 7 (41.2)                          | 0.492          | 10 (58.8)                          | 0.492          |
| 2-4                                   | 15                 | 8 (53.3)                          |                | 7 (46.7)                           |                |
| <b>PIT score</b>                      |                    |                                   |                |                                    |                |
| 0-1                                   | 20                 | 9 (45.0)                          | 0.784          | 12 (60.0)                          | 0.314          |
| 2-4                                   | 12                 | 6 (50.0)                          |                | 5 (41.7)                           |                |
| <b>IPI score</b>                      |                    |                                   |                |                                    |                |
| 0-1                                   | 24                 | 12 (50.0)                         | 0.539          | 14 (58.3)                          | 0.306          |
| 2-5                                   | 8                  | 3 (37.5)                          |                | 3 (37.5)                           |                |

P value as determined by Pearson's  $\chi^2$  test. \*, P < 0.05.
